# Supplementary material for: Isolation of Isocoumarins and Flavonoids as α-Glucosidase Inhibitors from Agrimonia pilosa L
Source: PubMed Central journal article supplement (PMC7321404; doi:10.3390/molecules25112572), 2020-05-31
Supplement: molecules-25-02572-s001.pdf [file molecules-25-02572-s001.pdf]

## Supplementary Materials

### Compound 1 (Agrimonolide)

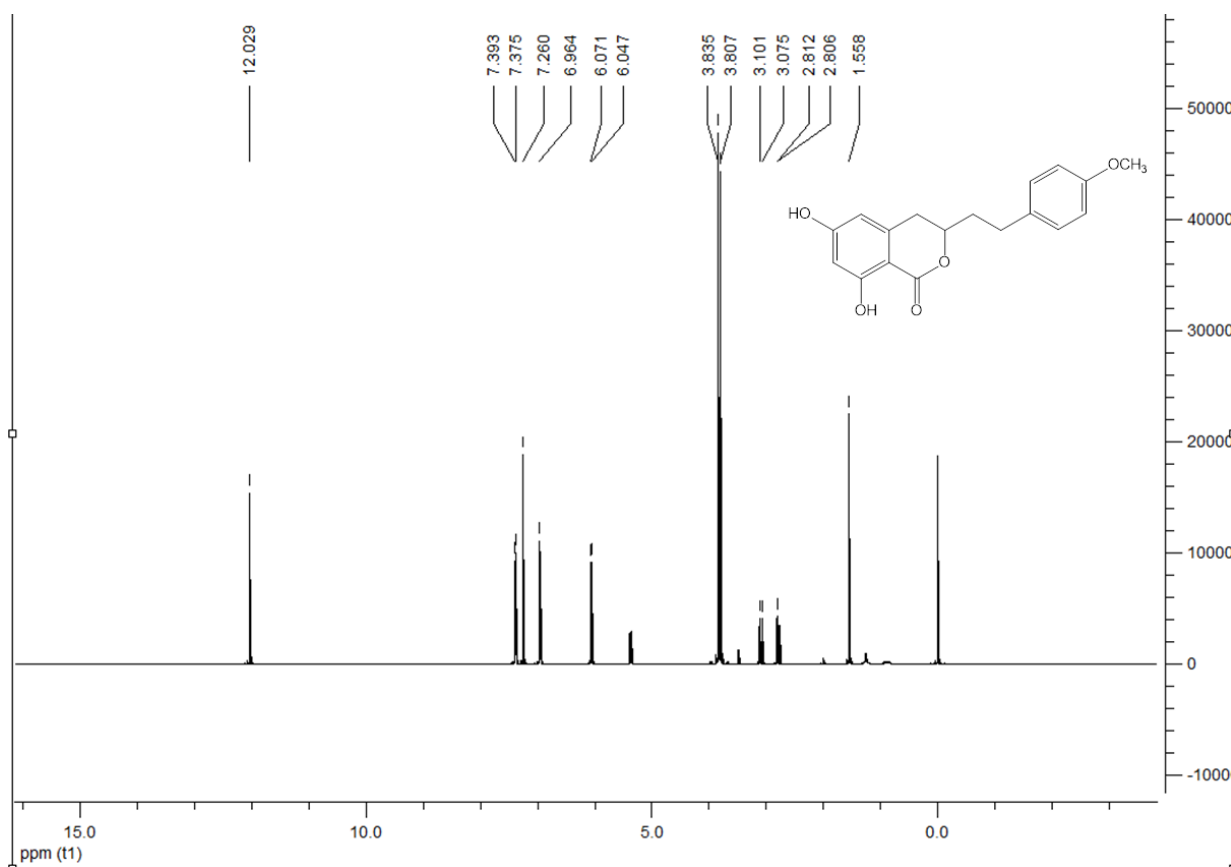

**Figure S1.** <sup>1</sup>H NMR spectrum of compound 1.

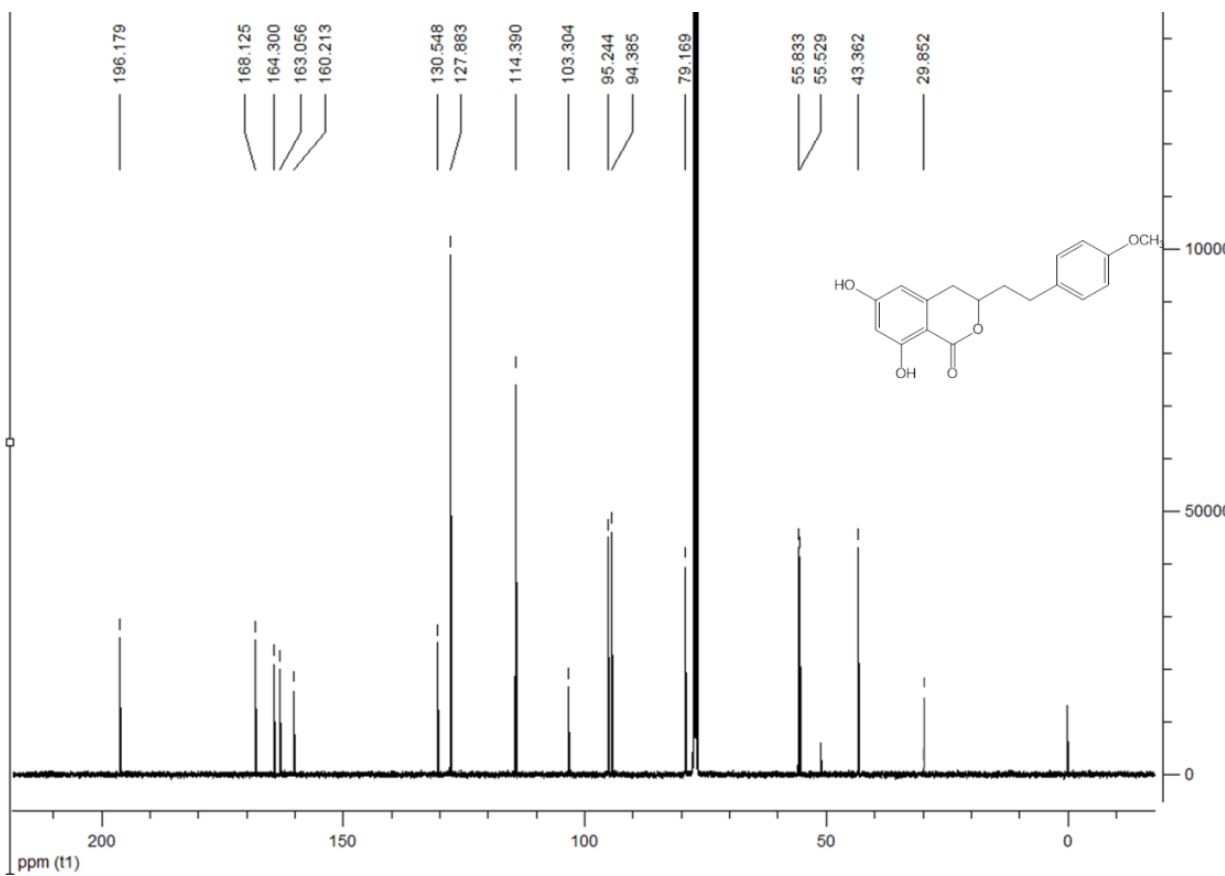

**Figure S2.** <sup>13</sup>C NMR spectrum of compound 1.

**Compound 2 (Agrimonolide-*O*- $\beta$ -*D*-glucopyranoside)**

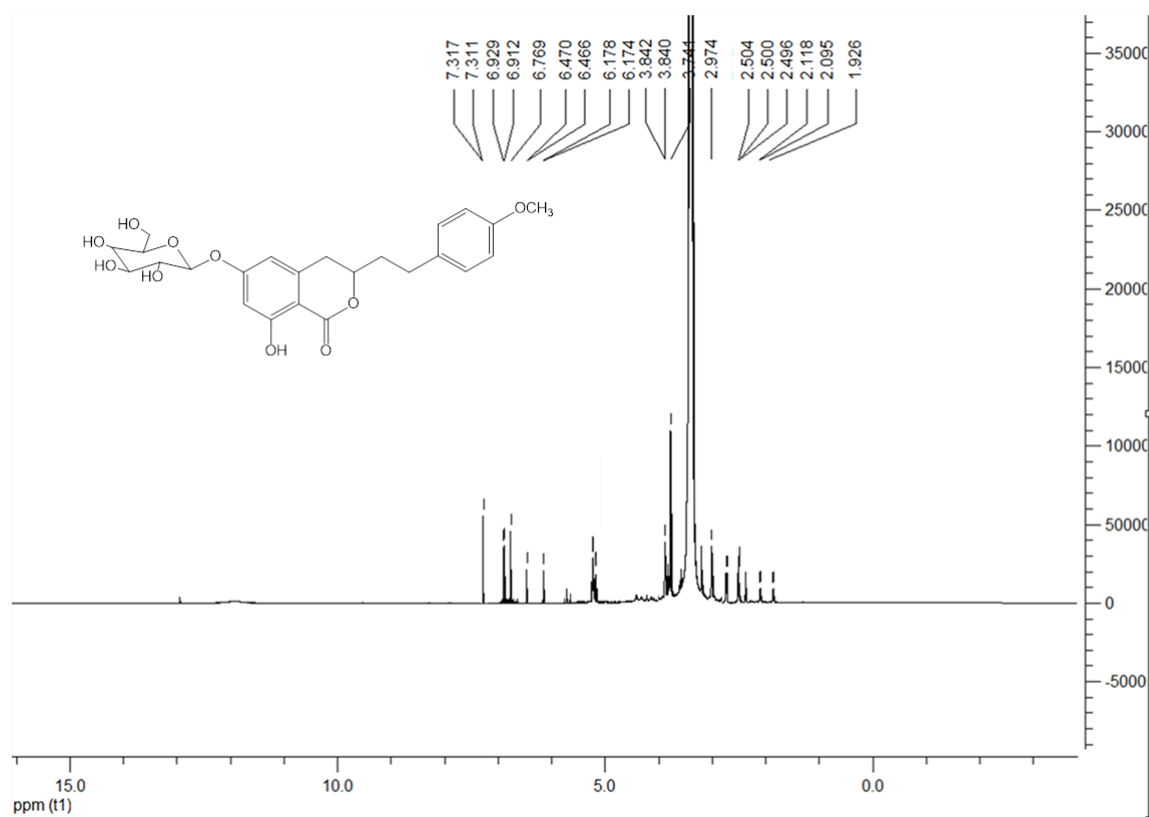

**Figure S3.** <sup>1</sup>H NMR spectrum of compound 2.

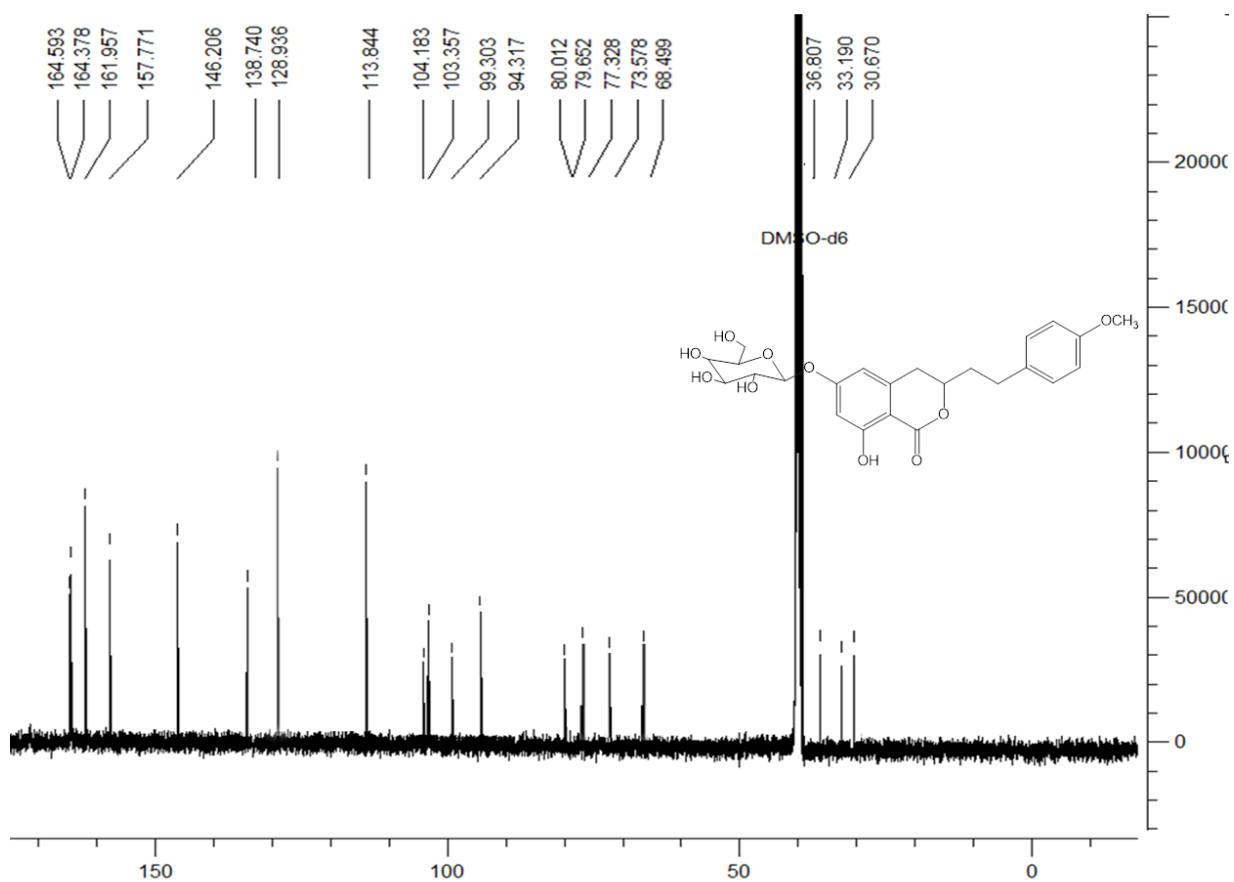

**Figure S4.**  $^{13}\text{C}$  NMR spectrum of compound 2.

**Compound 3 (Desmethylagrimonolide)**

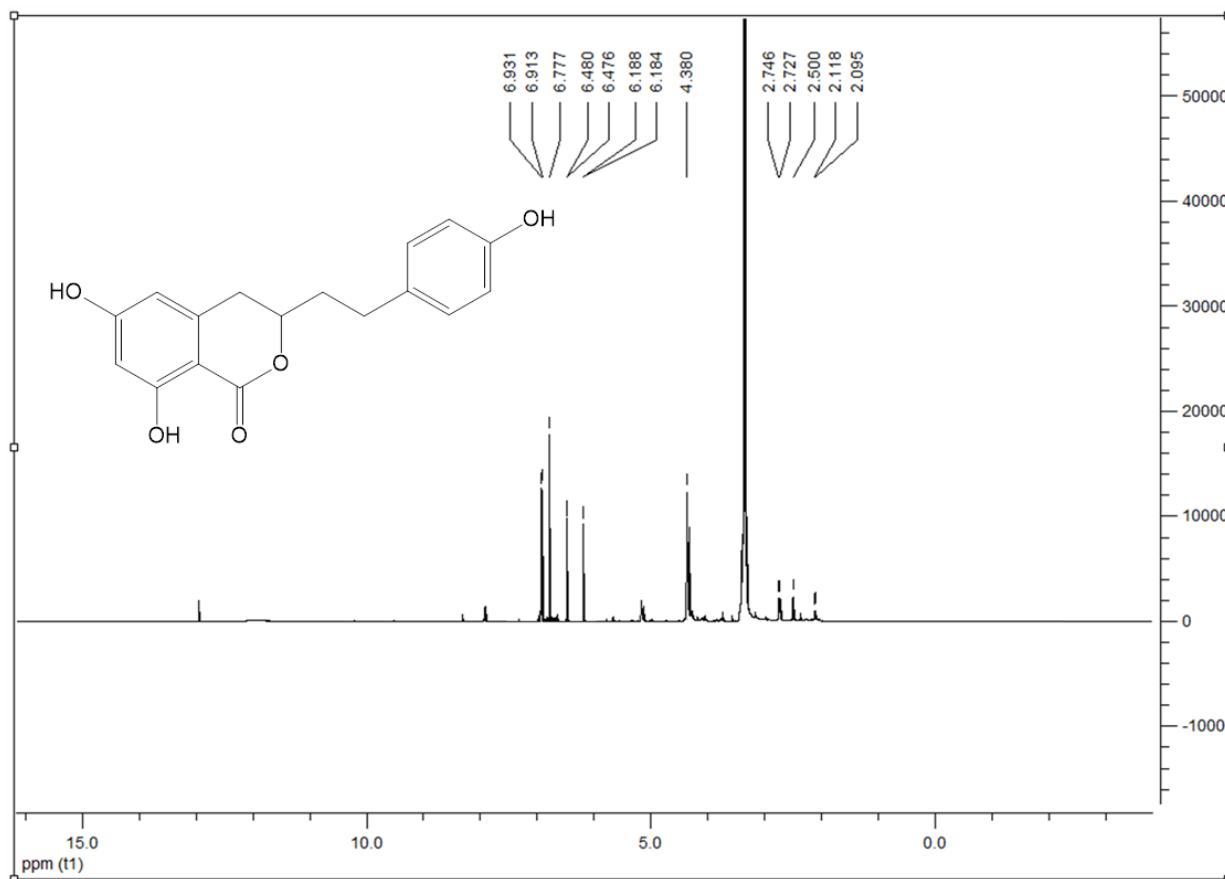

**Figure S5.** <sup>1</sup>H NMR spectrum of compound 3.

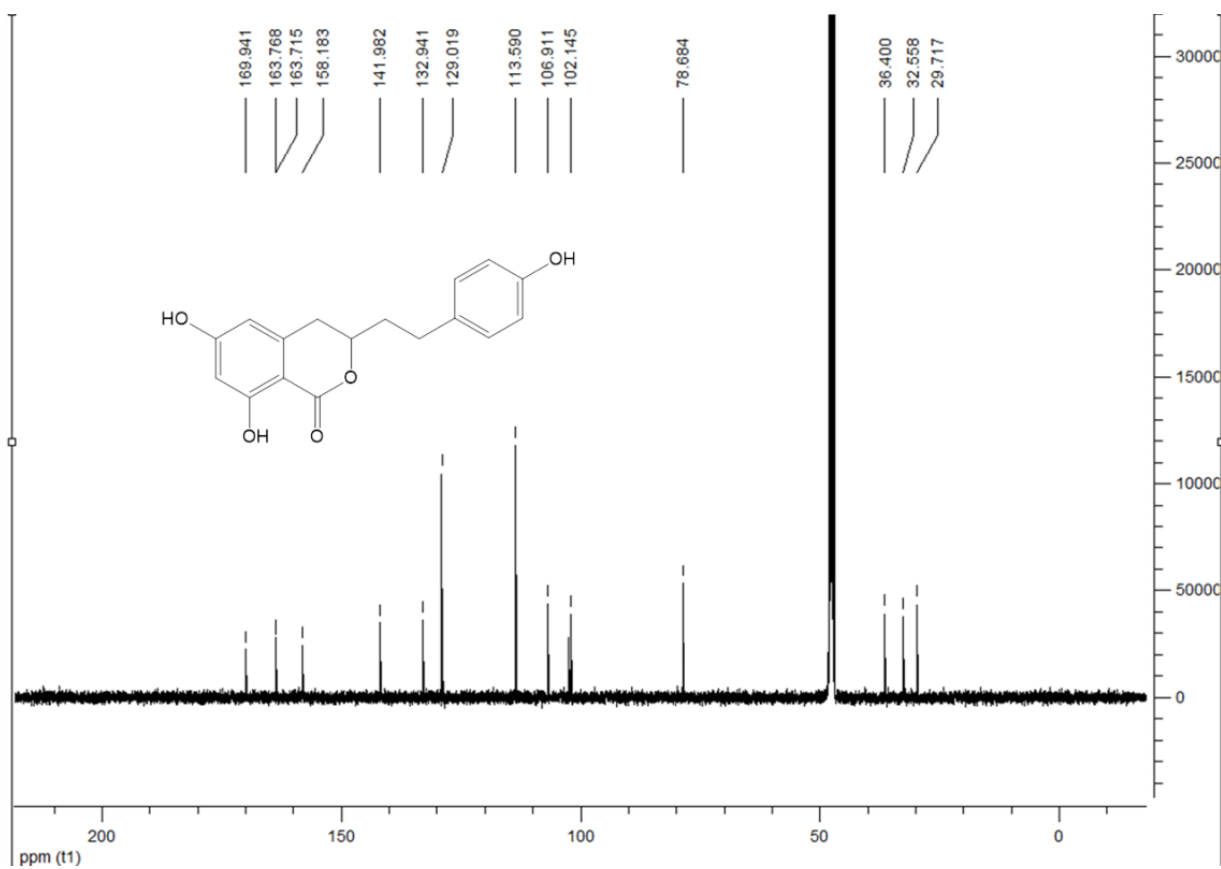

**Figure S6.**  $^{13}\text{C}$  NMR spectrum of compound 3.

**Compound 4 (Desmethylagcimonolide-*O*- $\beta$ -D-glucopyranoside)**

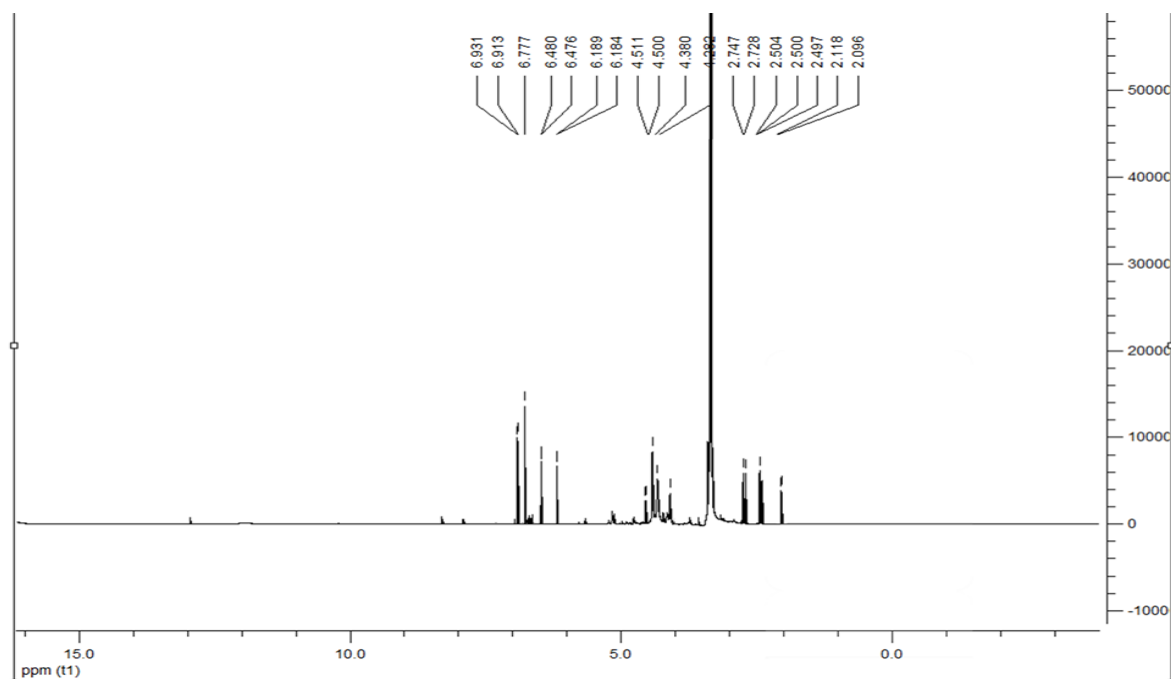

**Figure S7.** <sup>1</sup>H NMR spectrum of compound 4.

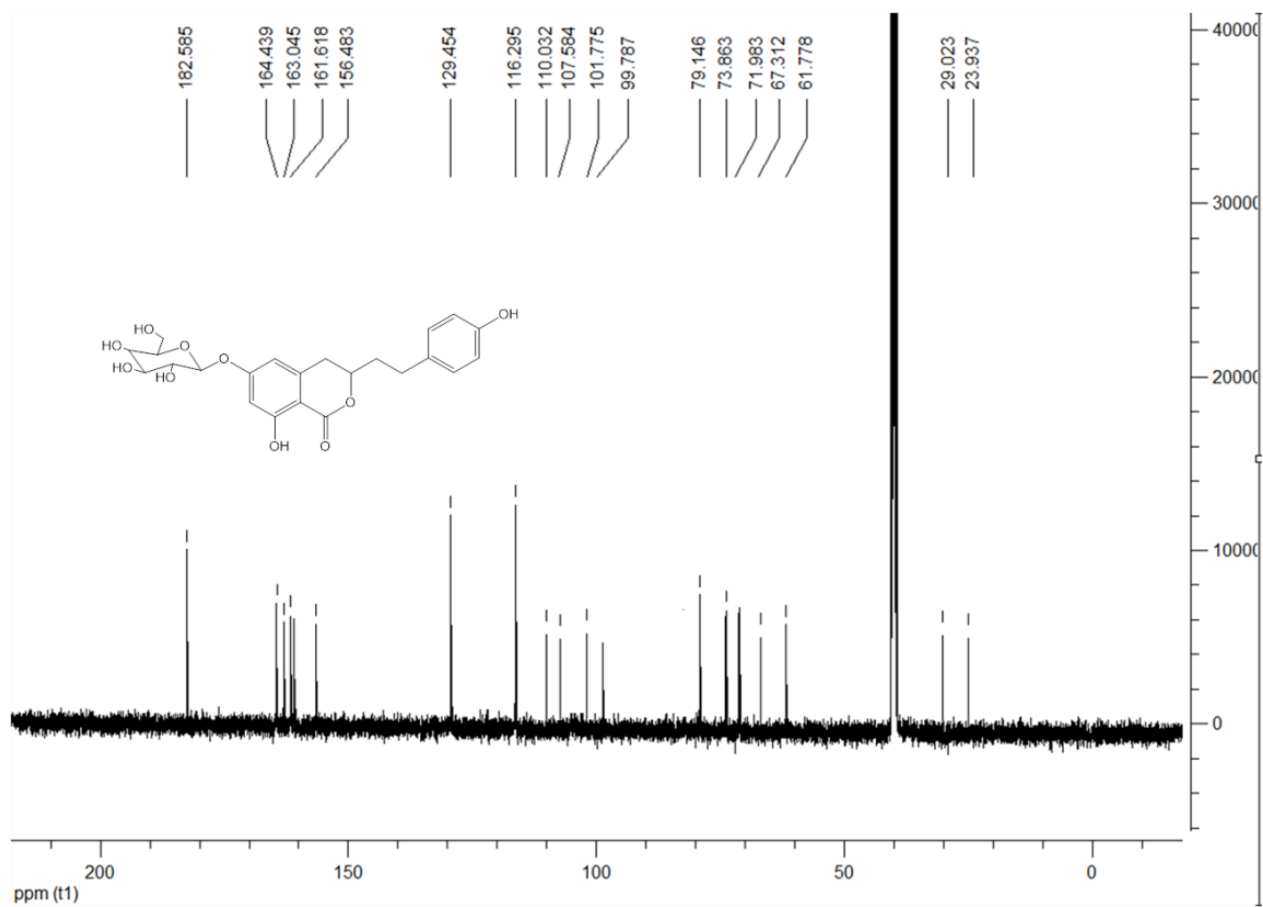

**Figure S8.**  $^{13}\text{C}$  NMR spectrum of compound 4.



# Compound 5 (Luteolin)

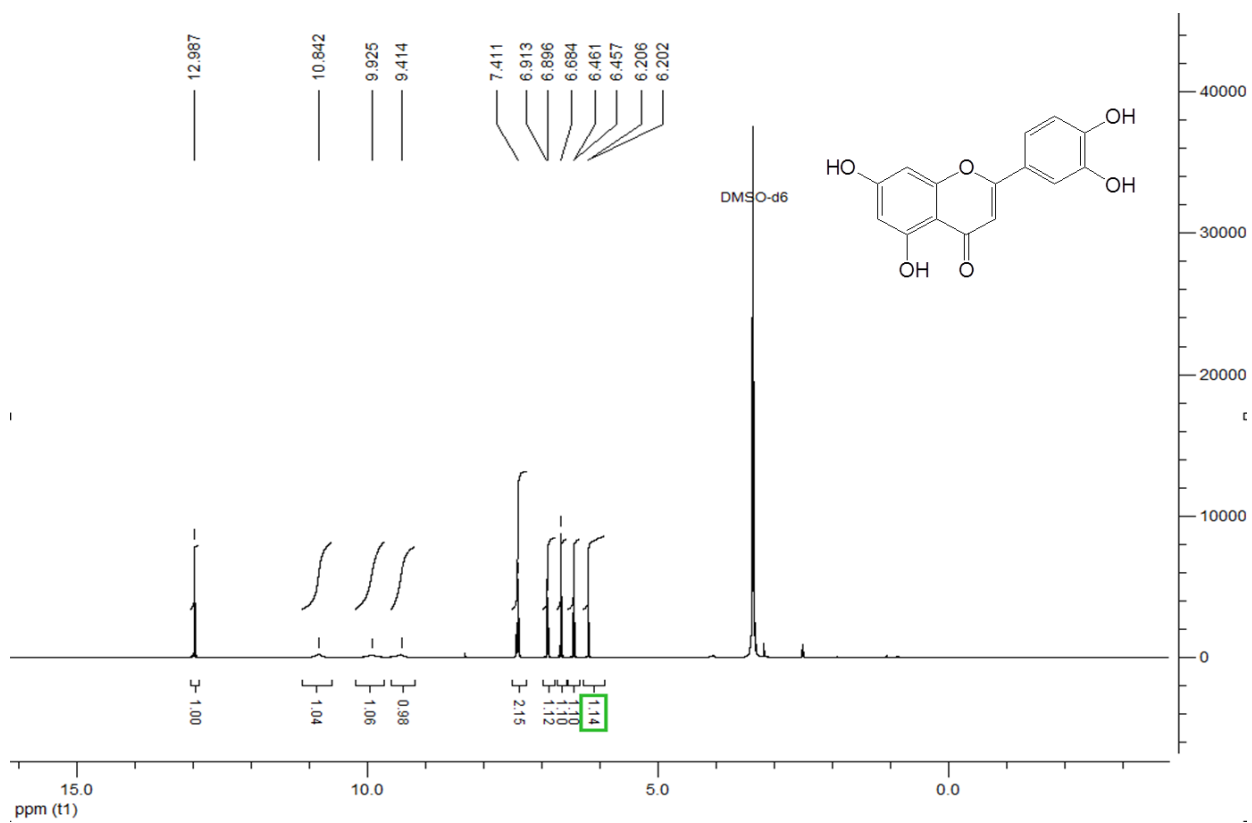

Figure S9. <sup>1</sup>H NMR spectrum of compound 5.

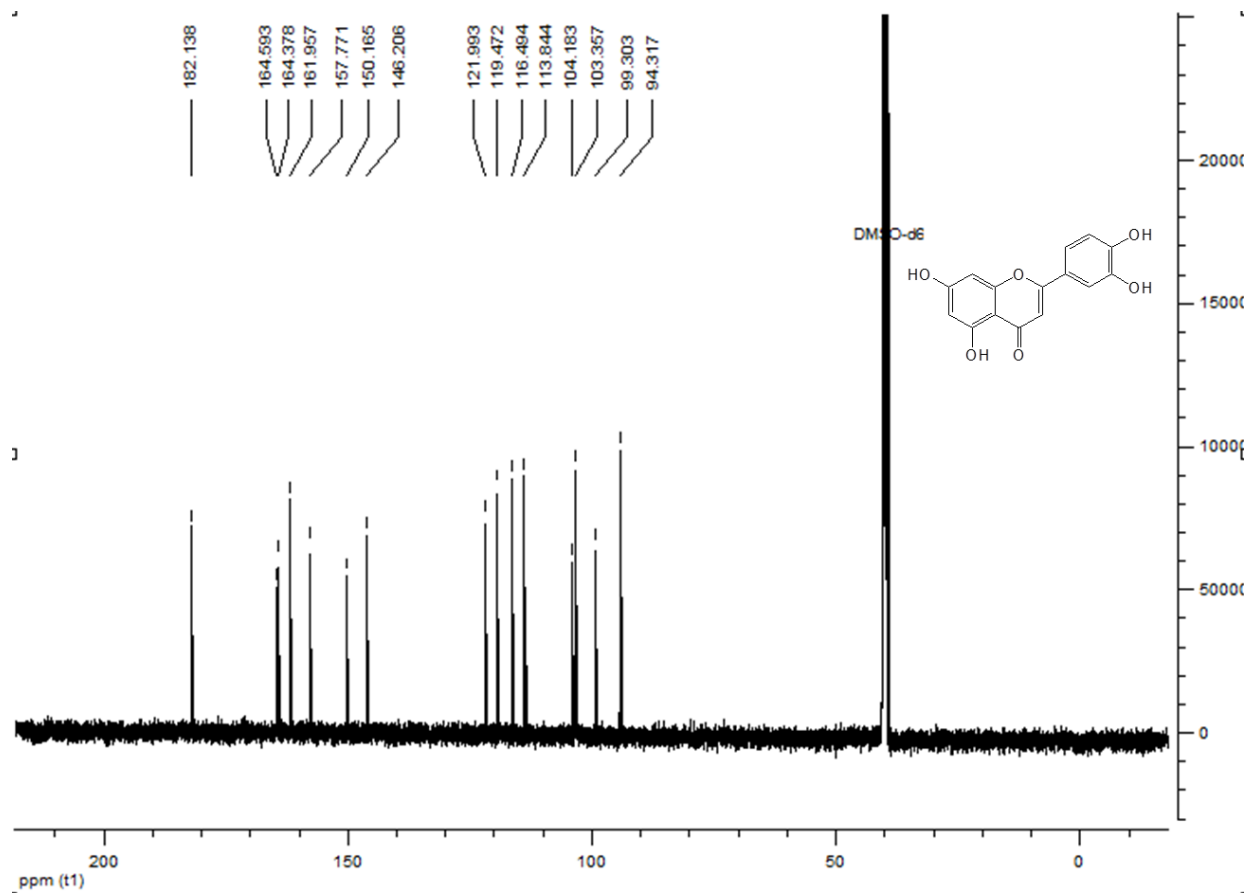

**Figure S10.**  $^{13}\text{C}$  NMR spectrum of compound 5.

# Compound 6 (Quercetin)

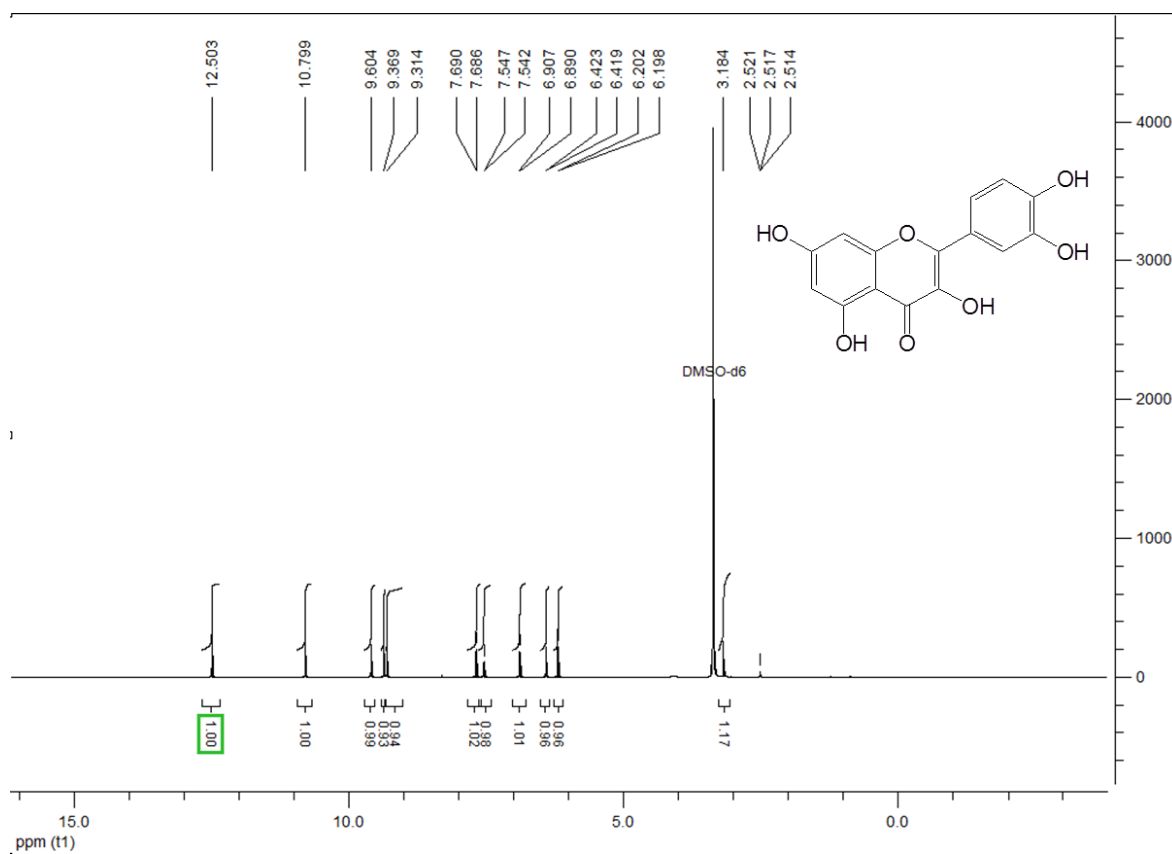

Figure S11. <sup>1</sup>H NMR spectrum of compound 6.

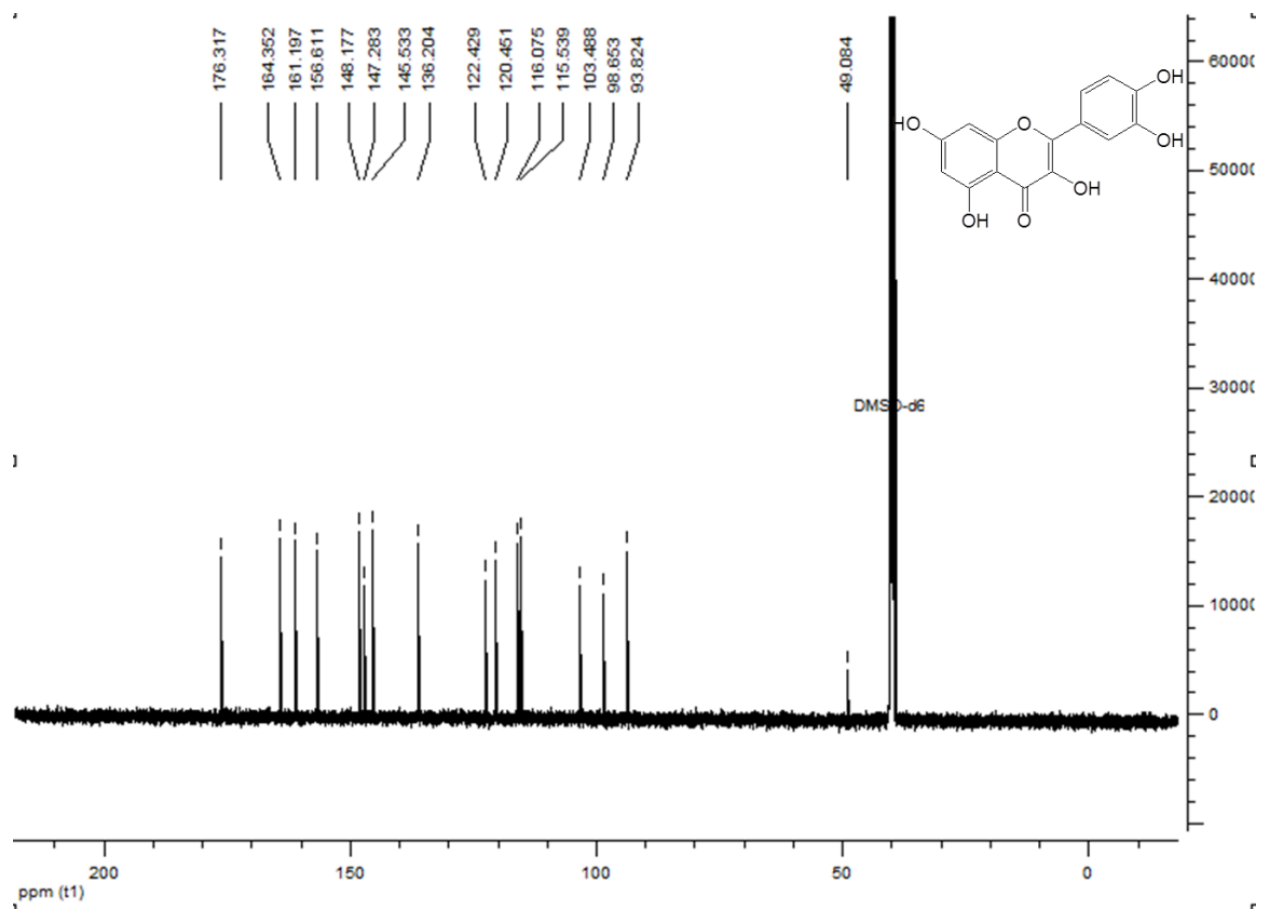

Figure S12.  $^{13}\text{C}$  NMR spectrum of compound 6.

# Compound 7 (Vitexin)

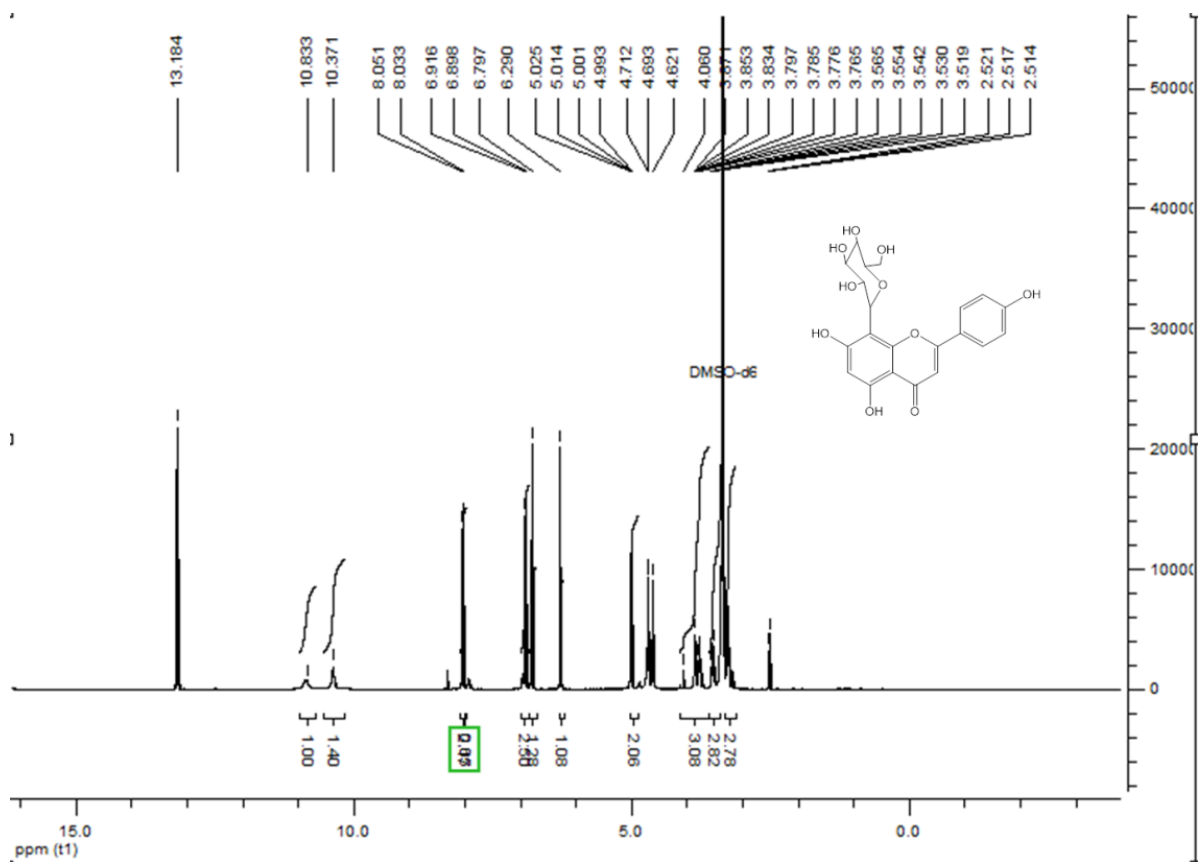

Figure S13. <sup>1</sup>H NMR spectrum of compound 7.

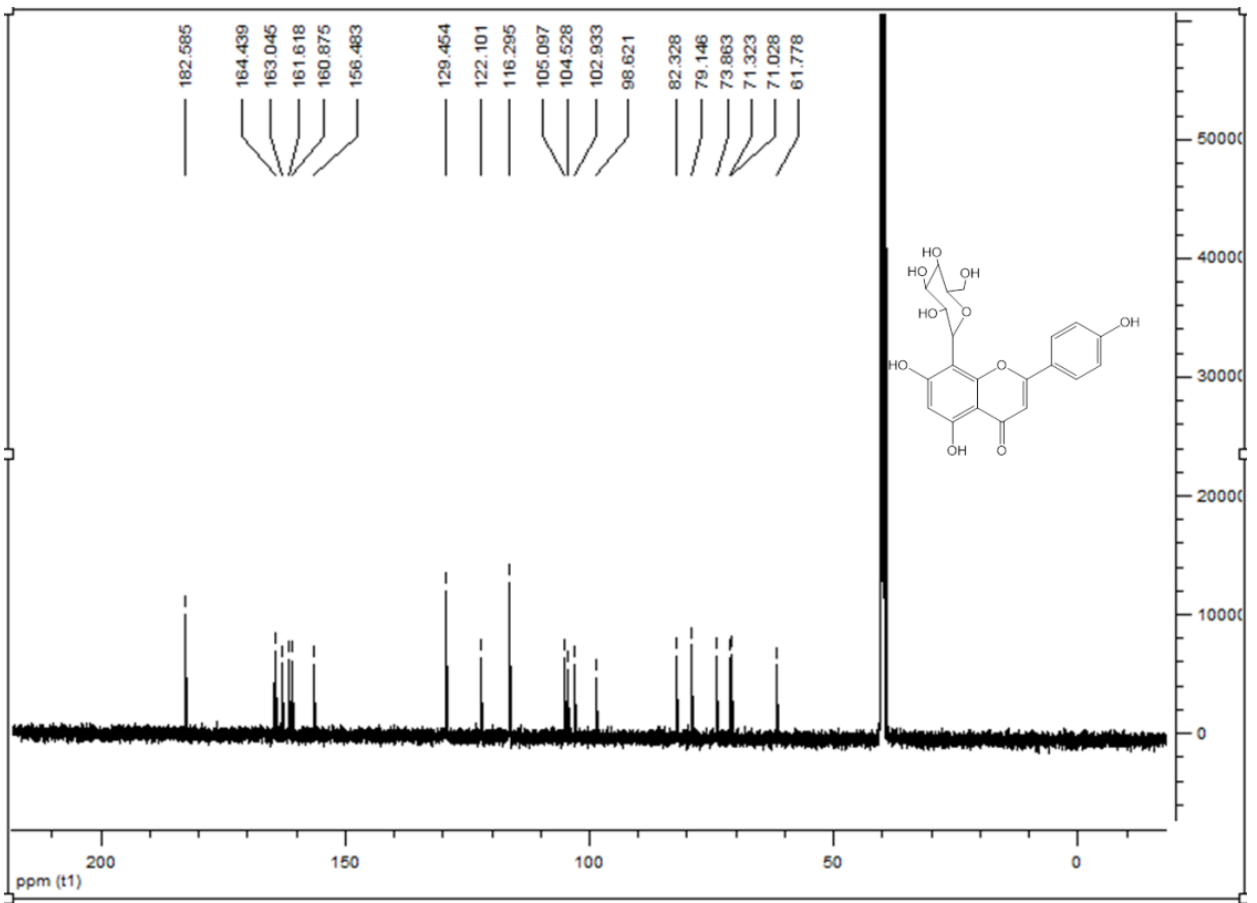

Figure S14.  $^{13}\text{C}$  NMR spectrum of compound 7.

# Compound 8 (Isovitexin)

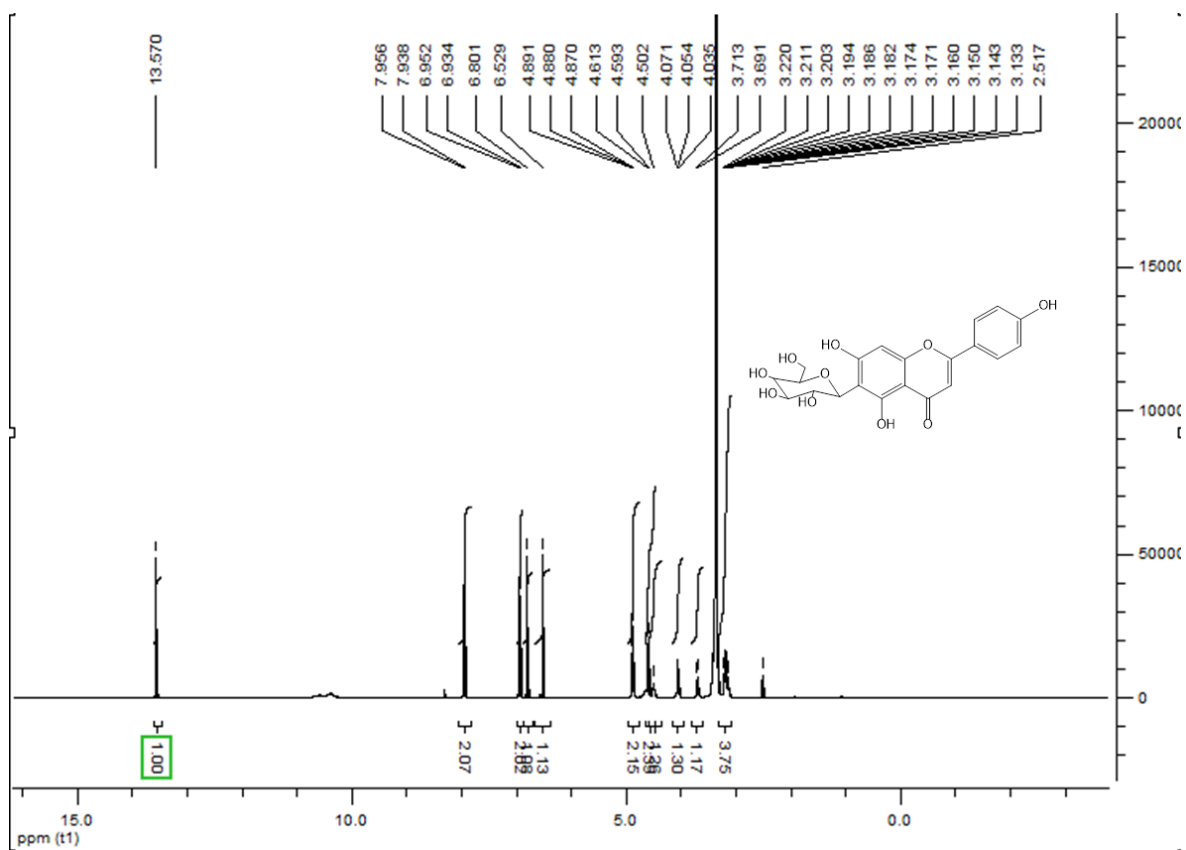

Figure S15. <sup>1</sup>H NMR spectrum of compound 8.

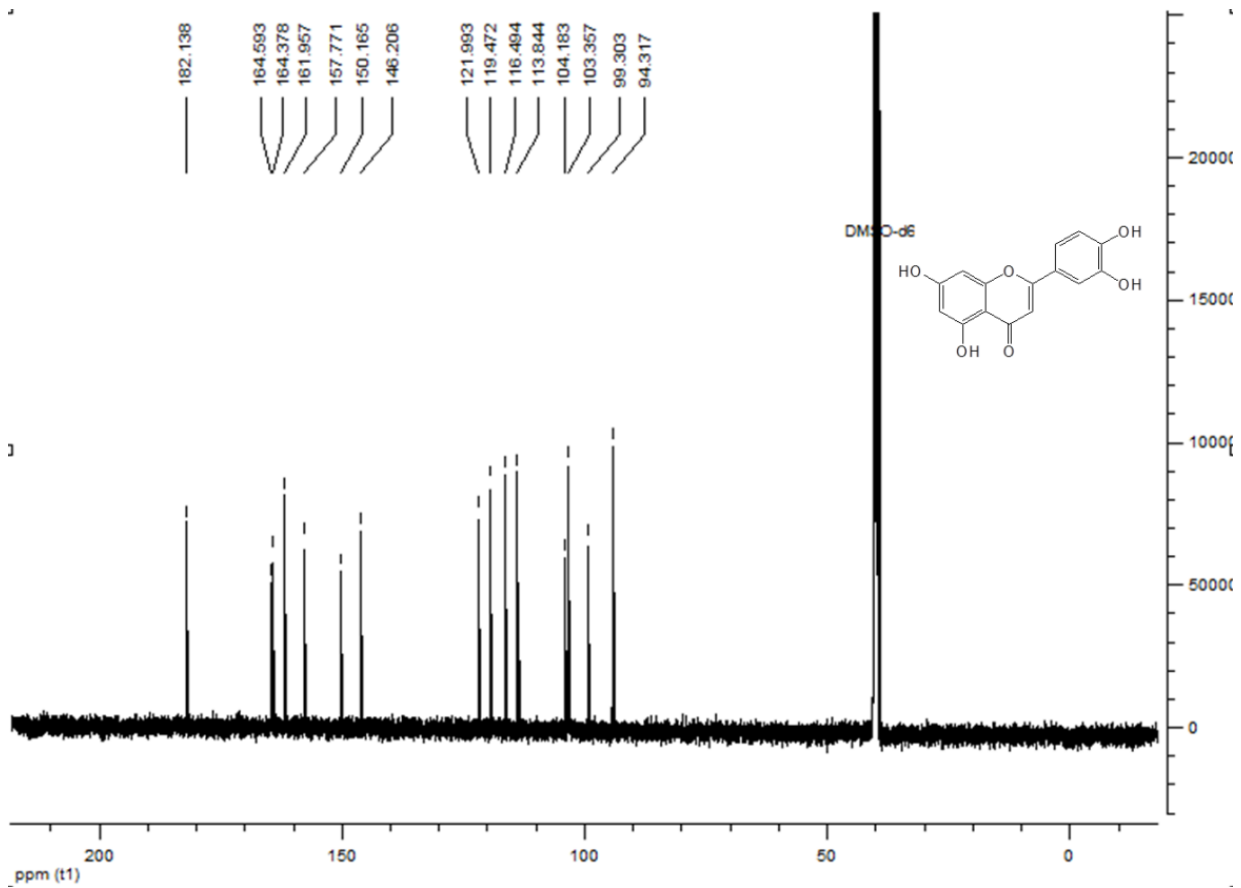

Figure S16.  $^{13}\text{C}$  NMR spectrum of compound 8.
